# Supplementary material
Source: PubMed Central journal article supplement (PMC2099635)
Supplement: bjpg57-530FigureS1.pdf [file bjpg57-530FigureS1.pdf]

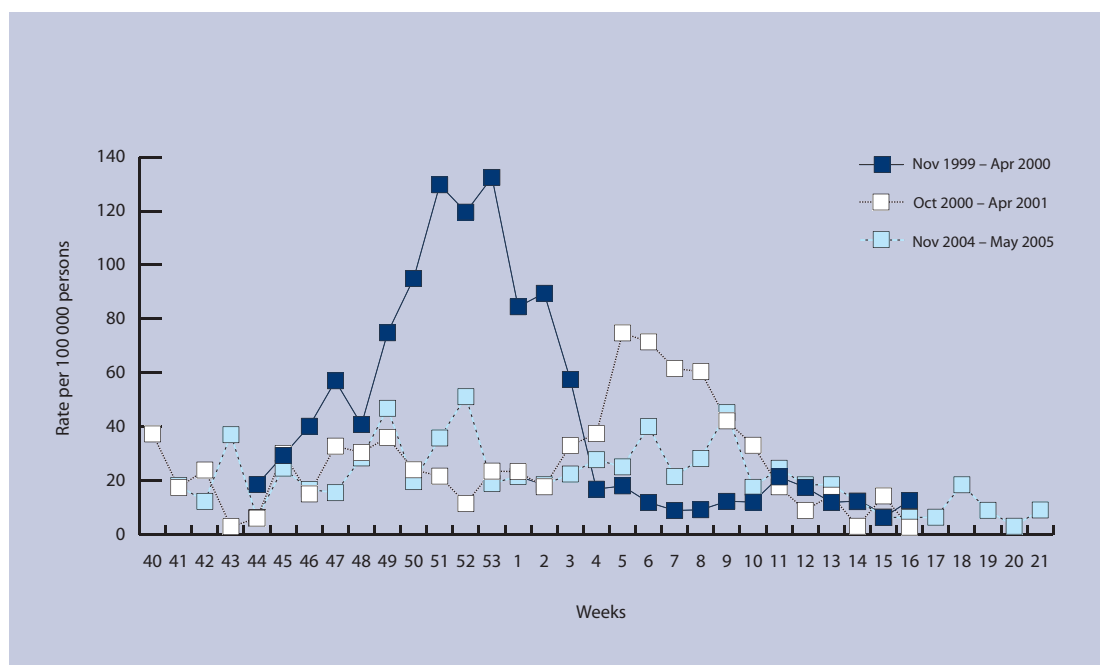

Supplementary Figure 1. Influenza-like illness (ICD9 487). Mean weekly incidence rate (per 100 000) in age group 0-4 years for winter periods November 1999 to May 2005.

Hay AD, Gorst C, Montgomery A, *et al.* Validation of a clinical rule to predict complications of acute cough in preschool children: a prospective study in primary care. *Br J Gen Pract* 2007; **57(540)**: 530-537. ©British Journal of General Practice
