# Supplementary material
Source: PubMed Central journal article supplement (PMC2099635)
Supplement: bjpg57-530TableS2.pdf [file bjpg57-530TableS2.pdf]

Supplementary Table 1. Derivation and validation cohort univariable associations with complications.

| Variables                                          | Derivation cohort |              |         | Validation cohort |              |         |
|----------------------------------------------------|-------------------|--------------|---------|-------------------|--------------|---------|
|                                                    | UOR               | 95% CI       | P-value | UOR               | 95% CI       | P-value |
| Sociodemographic                                   |                   |              |         |                   |              |         |
| Age in months                                      | 0.97              | 0.94 to 1.00 | 0.06    | 0.96              | 0.92 to 0.99 | 0.03    |
| Age groups, months                                 |                   |              |         |                   |              |         |
| <12                                                | 1                 |              | 0.10    | 1                 |              | 0.13    |
| 12–35                                              | 0.89              | 0.35 to 2.24 |         | 0.96              | 0.33 to 2.85 |         |
| 36–59                                              | 0.24              | 0.04 to 1.15 |         | 0.12              | 0.01 to 1.02 |         |
| Sex                                                |                   |              |         |                   |              |         |
| Female                                             | 1                 |              | 0.57    | 1                 |              | 0.06    |
| Male                                               | 1.28              | 0.54 to 3.12 |         | 0.38              | 0.14 to 1.08 |         |
| Ethnicity                                          |                   |              |         |                   |              |         |
| White                                              | 1                 |              | 0.57    | 1                 |              | 0.39    |
| Non-white                                          | 0.70              | 0.19 to 2.49 |         | 1.59              | 0.55 to 4.59 |         |
| Townsend deprivation score (continuous)            | 0.98              | 0.88 to 1.09 |         | 0.85              | 0.72 to 1.00 |         |
| Attends day care/nursery/school                    |                   |              |         |                   |              |         |
| No                                                 | 1                 |              | 0.82    | 1                 |              | 0.09    |
| Yes                                                | 0.90              | 0.37 to 2.16 |         | 0.42              | 0.15 to 1.14 |         |
| Breastfed for more than a month                    |                   |              |         |                   |              |         |
| No                                                 | 1                 |              | 0.81    | 1                 |              | 0.47    |
| Yes                                                | 0.89              | 0.37 to 2.13 |         | 0.70              | 0.26 to 1.87 |         |
| Lives with a resident smoker                       |                   |              |         |                   |              |         |
| No                                                 | 1                 |              | 0.67    | 1                 |              | 0.09    |
| Yes                                                | 1.20              | 0.50 to 2.86 |         | 0.33              | 0.09 to 1.18 |         |
| Shares a bedroom with at least one other child     |                   |              |         |                   |              |         |
| No                                                 | 1                 |              | 0.29    | 1                 |              | 0.80    |
| Yes                                                | 1.68              | 0.65 to 4.37 |         | 0.86              | 0.26 to 2.79 |         |
| Lives with at least two other children             |                   |              |         |                   |              |         |
| No                                                 | 1                 |              | 0.36    | 1                 |              | 0.62    |
| Yes                                                | 1.57              | 0.60 to 4.08 |         | 1.35              | 0.41 to 4.49 |         |
| Clinical history                                   |                   |              |         |                   |              |         |
| GP consultations in the previous year <sup>a</sup> |                   |              |         |                   |              |         |
| 0–1                                                | 1                 |              | 0.74    | 1                 |              | 0.08    |
| 2–4                                                | 0.69              | 0.23 to 2.09 |         | 0.45              | 0.09 to 2.14 |         |
| >4                                                 | 1.01              | 0.34 to 2.98 |         | 2.01              | 0.58 to 7.00 |         |
| Cough main reason for consultation                 |                   |              |         |                   |              |         |
| No                                                 | 1                 |              | 0.36    | 1                 |              | 0.35    |
| Yes                                                | 1.56              | 0.58 to 4.15 |         | 1.76              | 0.54 to 5.69 |         |
| Cough duration prior to recruitment                |                   |              |         |                   |              |         |
| Continuous                                         | 1.00              | 0.94 to 1.07 | 0.93    | 1.06              | 0.98 to 1.15 | 0.15    |
| First clinician contact for cough                  |                   |              |         |                   |              |         |
| No                                                 | 1                 |              | 0.83    | 1                 |              | 0.60    |
| Yes                                                | 0.90              | 0.35 to 2.31 |         | 0.73              | 0.22 to 2.40 |         |
| Personal history of atopy                          |                   |              |         |                   |              |         |
| No                                                 | 1                 |              | 0.32    | 1                 |              | 0.20    |
| Yes                                                | 0.58              | 0.18 to 1.79 |         | 0.42              | 0.12 to 1.55 |         |
| Family history of atopy                            |                   |              |         |                   |              |         |
| No                                                 | 1                 |              | 0.77    | 1                 |              | 0.71    |
| Yes                                                | 1.14              | 0.46 to 2.83 |         | 0.83              | 0.31 to 2.23 |         |

Continued ...<sup>a</sup>Excluding prior consultations for this episode of cough. UOR = univariable odds ratio.

Supplementary Table 1 continued.

| Variables                 | Derivation cohort |               |         | Validation cohort |              |         |
|---------------------------|-------------------|---------------|---------|-------------------|--------------|---------|
|                           | UOR               | 95% CI        | P-value | UOR               | 95% CI       | P-value |
| Clinical examination      |                   |               |         |                   |              |         |
| Illness severity          |                   |               |         |                   |              |         |
| Mild                      | 1                 |               | 0.57    | 1                 |              | 0.92    |
| Moderate or severe        | 1.34              | 0.49 to 3.64  |         | 0.94              | 0.29 to 3.06 |         |
| Abnormal chest signs      |                   |               |         |                   |              |         |
| No                        | 1                 |               | 0.046   | 1                 |              | 0.73    |
| Yes                       | 2.72              | 1.06 to 6.96  |         | 0.81              | 0.25 to 2.65 |         |
| Fever                     |                   |               |         |                   |              |         |
| No                        | 1                 |               | 0.005   | 1                 |              | 0.35    |
| Yes                       | 4.86              | 1.74 to 13.56 |         | 0.37              | 0.05 to 2.97 |         |
| Tachypnoea                |                   |               |         |                   |              |         |
| No                        | 1                 |               | 0.033   | 1                 |              | 2.98    |
| Yes                       | 3.80              | 1.22 to 11.84 |         | 0.48              | 0.03 to 8.83 |         |
| Clinical assessment       |                   |               |         |                   |              |         |
| Classification of cough   |                   |               |         |                   |              |         |
| URTI <sup>a</sup>         | 1                 |               | 0.21    | 1                 |              | 0.80    |
| Other                     | 1.83              | 0.72 to 4.59  |         | 0.87              | 0.30 to 2.48 |         |
| Treatment                 |                   |               |         |                   |              |         |
| Prescribed antibiotic     |                   |               |         |                   |              |         |
| No                        | 1                 |               | 0.53    | 1                 |              | 0.09    |
| Yes                       | 1.42              | 0.49 to 4.11  |         | 0.17              | 0.02 to 1.30 |         |
| Prescribed bronchodilator |                   |               |         |                   |              |         |
| No                        | 1                 |               | 0.15    | 1                 |              | 0.21    |
| Yes                       | 2.31              | 0.77 to 6.88  |         | 2.46              | 0.61 to 9.95 |         |

<sup>a</sup>Upper respiratory tract infection. UOR = univariable odds ratio.

Hay AD, Gorst C, Montgomery A, *et al.* A prospective study to validate a clinical rule to predict complications of acute cough in pre-school children presenting in primary care. *Br J Gen Pract* 2007; **57**: ©British Journal of General Practice
